# Supplementary material for: Dual targeting of PI3K and BCL‐2 overcomes ibrutinib resistance in aggressive mantle cell lymphoma
Source: PubMed Central journal article supplement (PMC9097828; doi:10.1111/jcmm.17297), 2022-03-30
Supplement: JCMM-26-3068-s001.pdf [file JCMM-26-3068-s001.pdf]

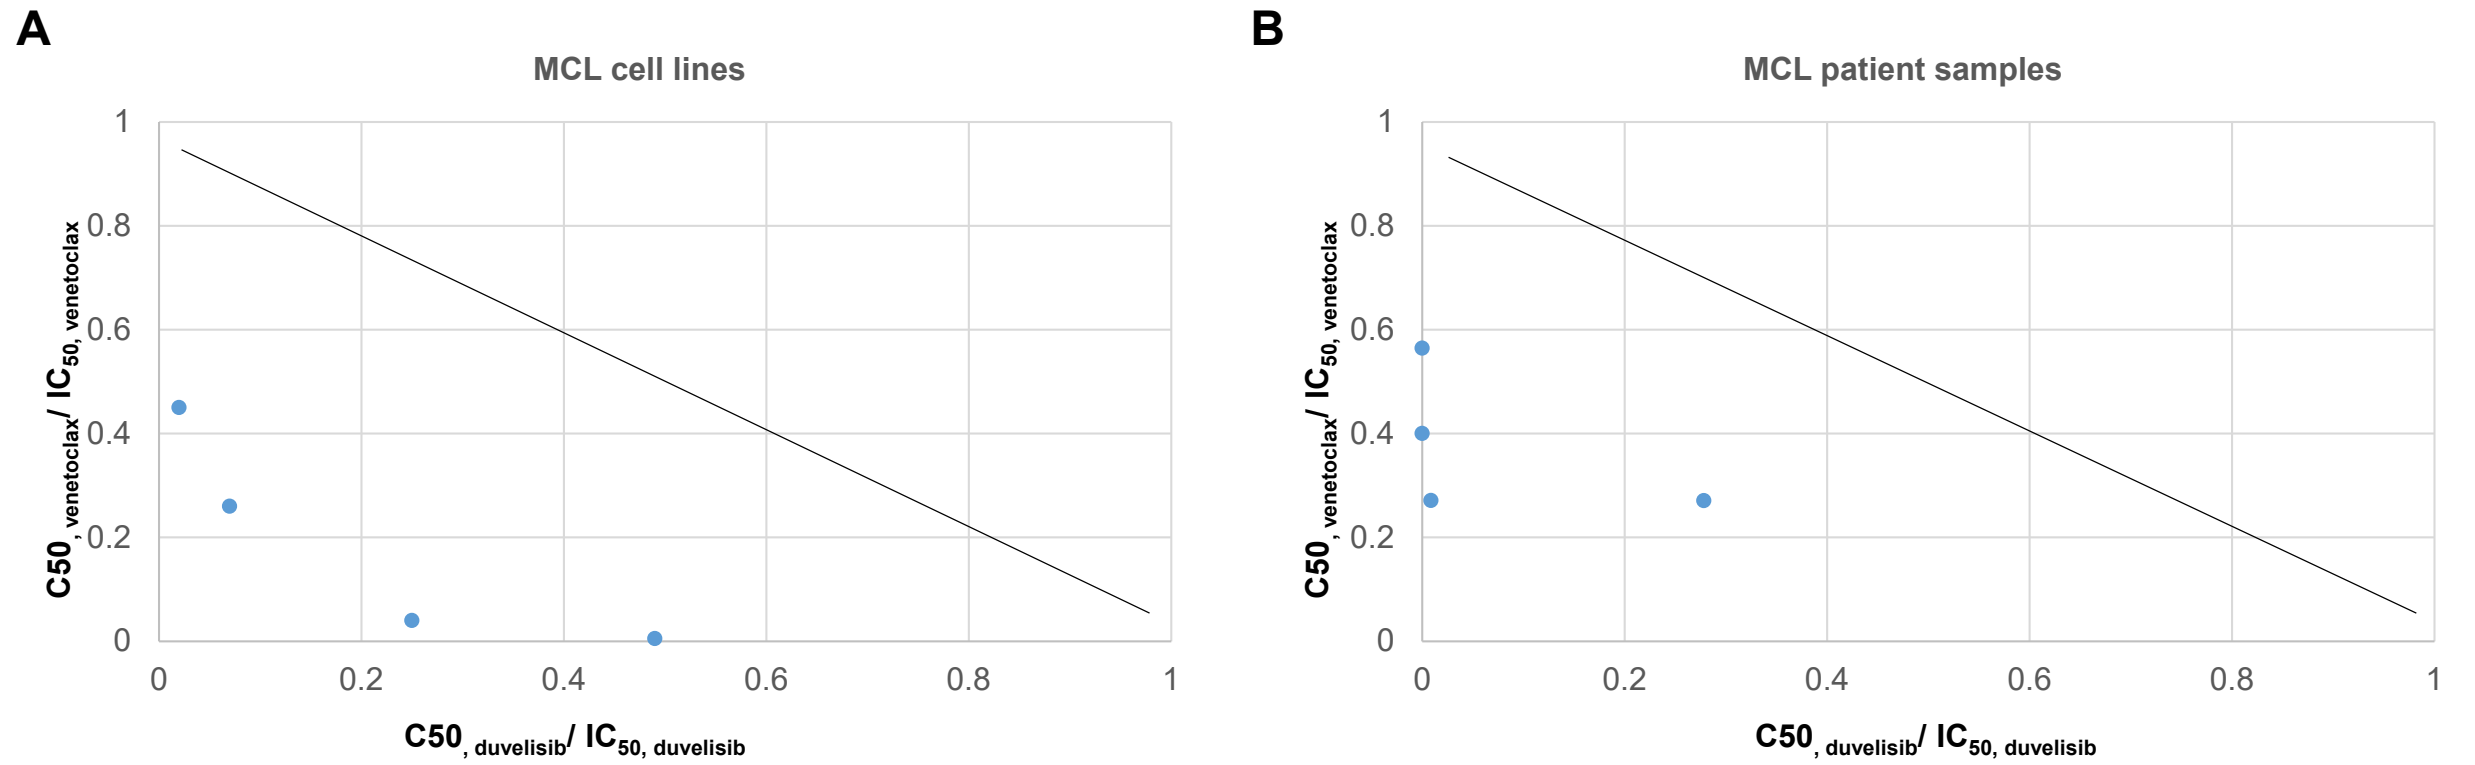

Supplementary Figure S1. Isobologram analysis for combinational effect of duvelisib and venetoclax in MCL cell lines (n = 4) (A) and primary patient samples (n = 4) (B).

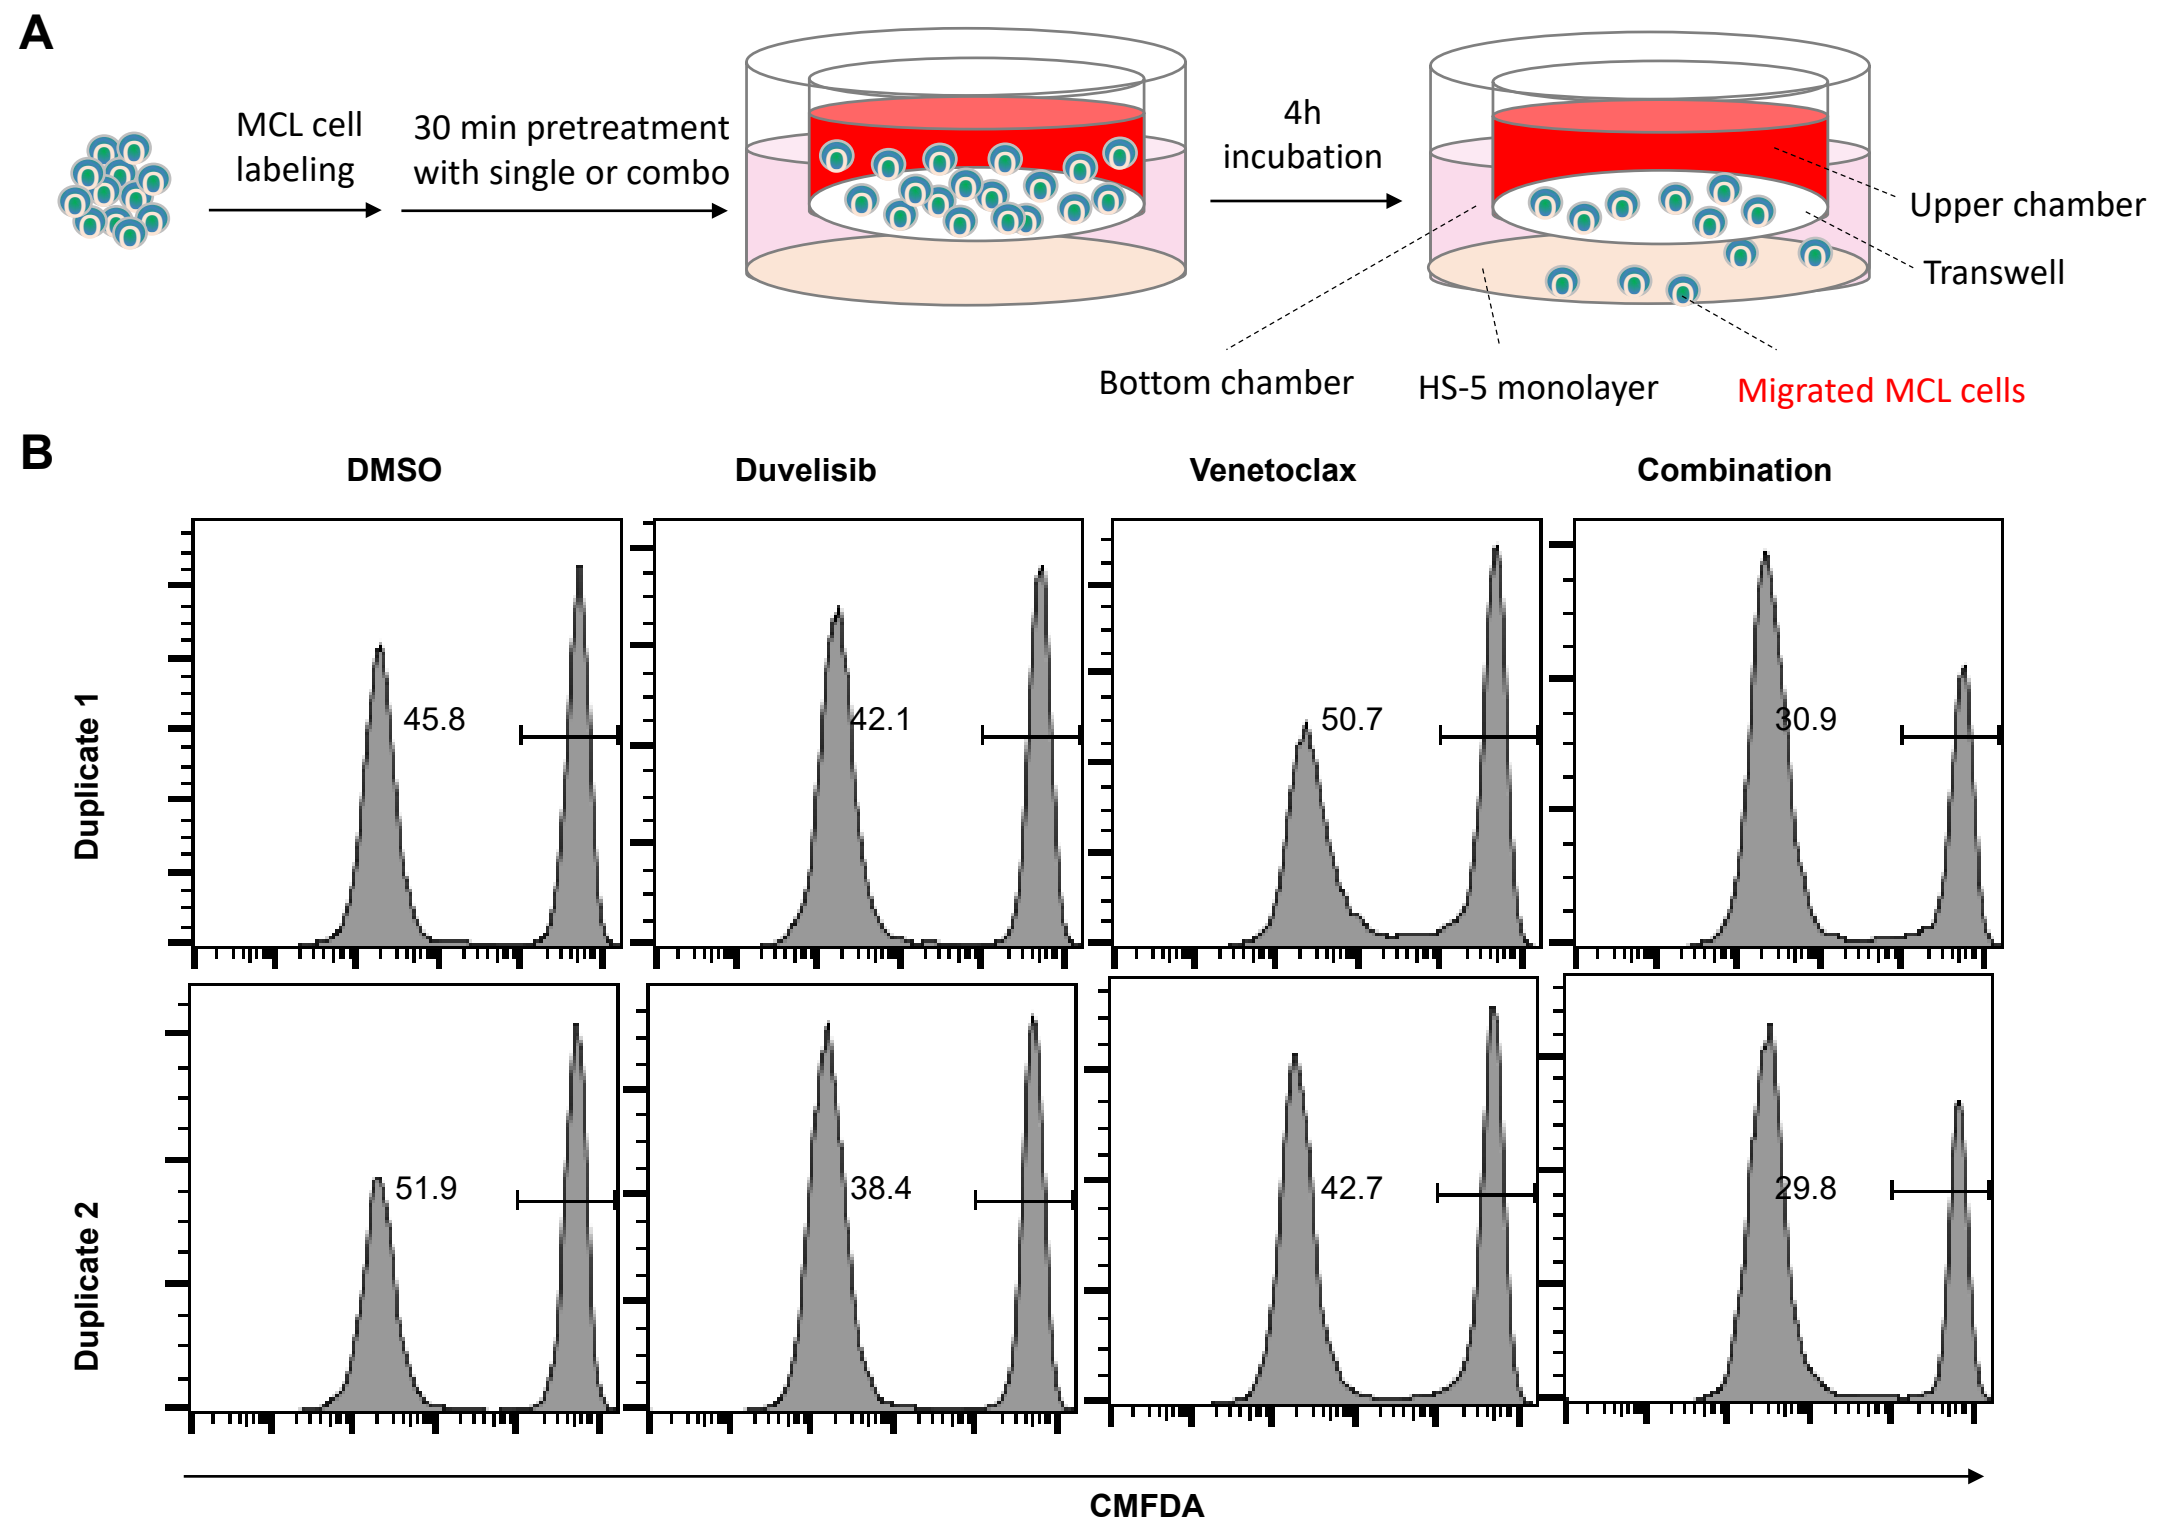

**Supplementary Figure 2: Duvelisib and venetoclax combination showed greater inhibition in TME-mediated cell migration *in vitro*.** (A) Schematic design for *in vitro* MCL cell migration. Ibrutinib-resistant JeKo BTK KD cells were stained with CellTracker™ Green CMFDA Dye and pretreated with DMSO, duvelisib at 5  $\mu$ M, venetoclax at 100 nM, alone or in combination, for 30 minutes and washed with 1x PBS before adding to the upper chamber for the trans-well migration assay. The bottom chamber was pre-seeded with human stroma cell lines HS-5 overnight. The trans-well systems were incubated for 4 hours before collection of migrated MCL cells and flow cytometry analysis. (B) Migrated MCL cells were detected by flow cytometry based on CMFDA-labeling. Representative flow cytometry data are shown. The CMFDA-positive cells (the right peak) represent the migrated MCL cells into the lower chamber that were CMFDA-labelled before loading into the upper chamber, and the negative cells (the left peak) represent the HS-5 cells which were not labeled with CMFDA.

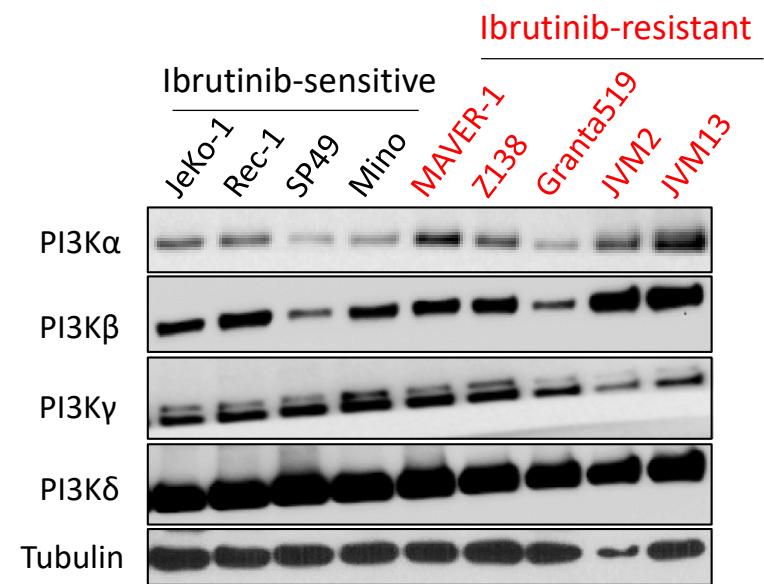

**Supplementary Figure S3: Expression of PI3K isoforms in ibrutinib-sensitive (black) and -resistant (red) MCL cell lines.**

**Supplementary Table S1. Clinical characteristics of patients with MCL.**

| <b>Characteristics</b>              | <b>Patient 1</b> | <b>Patient 2</b> | <b>Patient 3</b> | <b>Patient 4</b> |
|-------------------------------------|------------------|------------------|------------------|------------------|
| <b>Sex</b>                          | M                | M                | F                | M                |
| <b>Age</b>                          | 75               | 69               | 70               | 50               |
| <b>Bone marrow involvement</b>      | Positive         | Negative         | Positive         | low              |
| <b>Peripheral blood involvement</b> | Positive         | Positive         | Positive         | Positive         |
| <b>Karyotype</b>                    | Complex          | Normal           | Complex          | Normal           |
| <b>TP53</b>                         | NA               | Positive         | NA               | NA               |
| <b>Ki67</b>                         | 20%              | >95%             | 65%              | 40-50%           |
| <b>Sox11</b>                        | NA               | Positive         | Positive         | NA               |
| <b>Histology type</b>               | Blastoid         | Blastoid         | Blastoid         | classic          |
| <b>Prior therapy</b>                | 1                | 1                | 1                | 2                |
| <b>BTKi therapy</b>                 | Acalabrutinib    | Ibrutinib        | Ibrutinib        | Ibrutinib        |
| <b>Response to BTKi therapy</b>     | Relapsed         | Relapsed         | Relapsed         | Relapsed         |
| <b>Ibrutinib-resistant</b>          | Yes              | Yes              | Yes              | Yes              |
